# Supplementary material
Source: PubMed Central journal article supplement (PMC6078197)
Supplement: NIHMS977086-supplement-Supporting_Information.pdf [file NIHMS977086-supplement-Supporting_Information.pdf]

# Supporting Information

Structure-activity relationships of new natural  
product-based diaryloxazoles with selective activity  
against androgen receptor-positive breast cancer  
cells

Andrew J. Robles,<sup>†</sup> Shelby McCowen,<sup>§,⊥</sup> Shengxin Cai,<sup>Ⓛ,∇</sup> Michaels Glassman,<sup>§,⊥</sup> Francisco

Ruiz II,<sup>§,¥</sup> Robert H. Cichewicz,<sup>Ⓛ,∇</sup> Stanton F. McHardy,<sup>\*,†,§</sup> and Susan L. Mooberry<sup>\*,†,‡</sup>

<sup>†</sup>Department of Pharmacology, and <sup>‡</sup>UT Health San Antonio Cancer Center, UT Health San Antonio, 7703 Floyd Curl Drive, San Antonio, TX 78229, U.S.A.

<sup>§</sup>Center for Innovative Drug Discovery, and <sup>⊥</sup>Department of Chemistry, The University of Texas at San Antonio, 1 UTSA Circle, San Antonio, TX, 78249. U.S.A.

<sup>Ⓛ</sup>Natural Product Discovery Group, Institute for Natural Products Applications and Research Technologies, and <sup>∇</sup>Department of Chemistry & Biochemistry, University of Oklahoma, 101 Stephenson Parkway, Norman, OK, 73019, U.S.A.

## TABLE OF CONTENTS

|             |                                                               |          |
|-------------|---------------------------------------------------------------|----------|
| Figure S1:  | $^1\text{H}$ spectra for compound <b>1</b>                    | Page S3  |
| Figure S2:  | $^{13}\text{C}$ spectra for compound <b>1</b>                 | Page S4  |
| Figure S3:  | $^1\text{H}$ spectra for compound <b>2</b> (full)             | Page S5  |
| Figure S4:  | $^1\text{H}$ spectra for compound <b>2</b> (enlargement 1)    | Page S6  |
| Figure S5:  | $^1\text{H}$ spectra for compound <b>2</b> (enlargement 2)    | Page S7  |
| Figure S6:  | $^{13}\text{C}$ spectra for compound <b>2</b> (full)          | Page S8  |
| Figure S7:  | $^{13}\text{C}$ spectra for compound <b>2</b> (enlargement 1) | Page S9  |
| Figure S8:  | $^{13}\text{C}$ spectra for compound <b>2</b> (enlargement 2) | Page S10 |
| Figure S9:  | gCOSY spectra for compound <b>1</b>                           | Page S11 |
| Figure S10: | NOESY2D spectra for compound <b>1</b> (full)                  | Page S12 |
| Figure S11: | NOESY2D spectra for compound <b>1</b> (enlargement 1)         | Page S13 |
| Figure S12: | gCOSY spectra for compound <b>2</b>                           | Page S14 |
| Figure S13: | NOESY2D spectra for compound <b>2</b>                         | Page S15 |
| Figure S14: | NOESY2D spectra for compound <b>2</b> (enlargement 1)         | Page S16 |
| Figure S15: | $^1\text{H}$ spectra for compound <b>6</b> (Brent Copp Route) | Page S17 |
| Figure S16: | $^1\text{H}$ spectra for compound <b>6</b> (Van Leuson Route) | Page S18 |

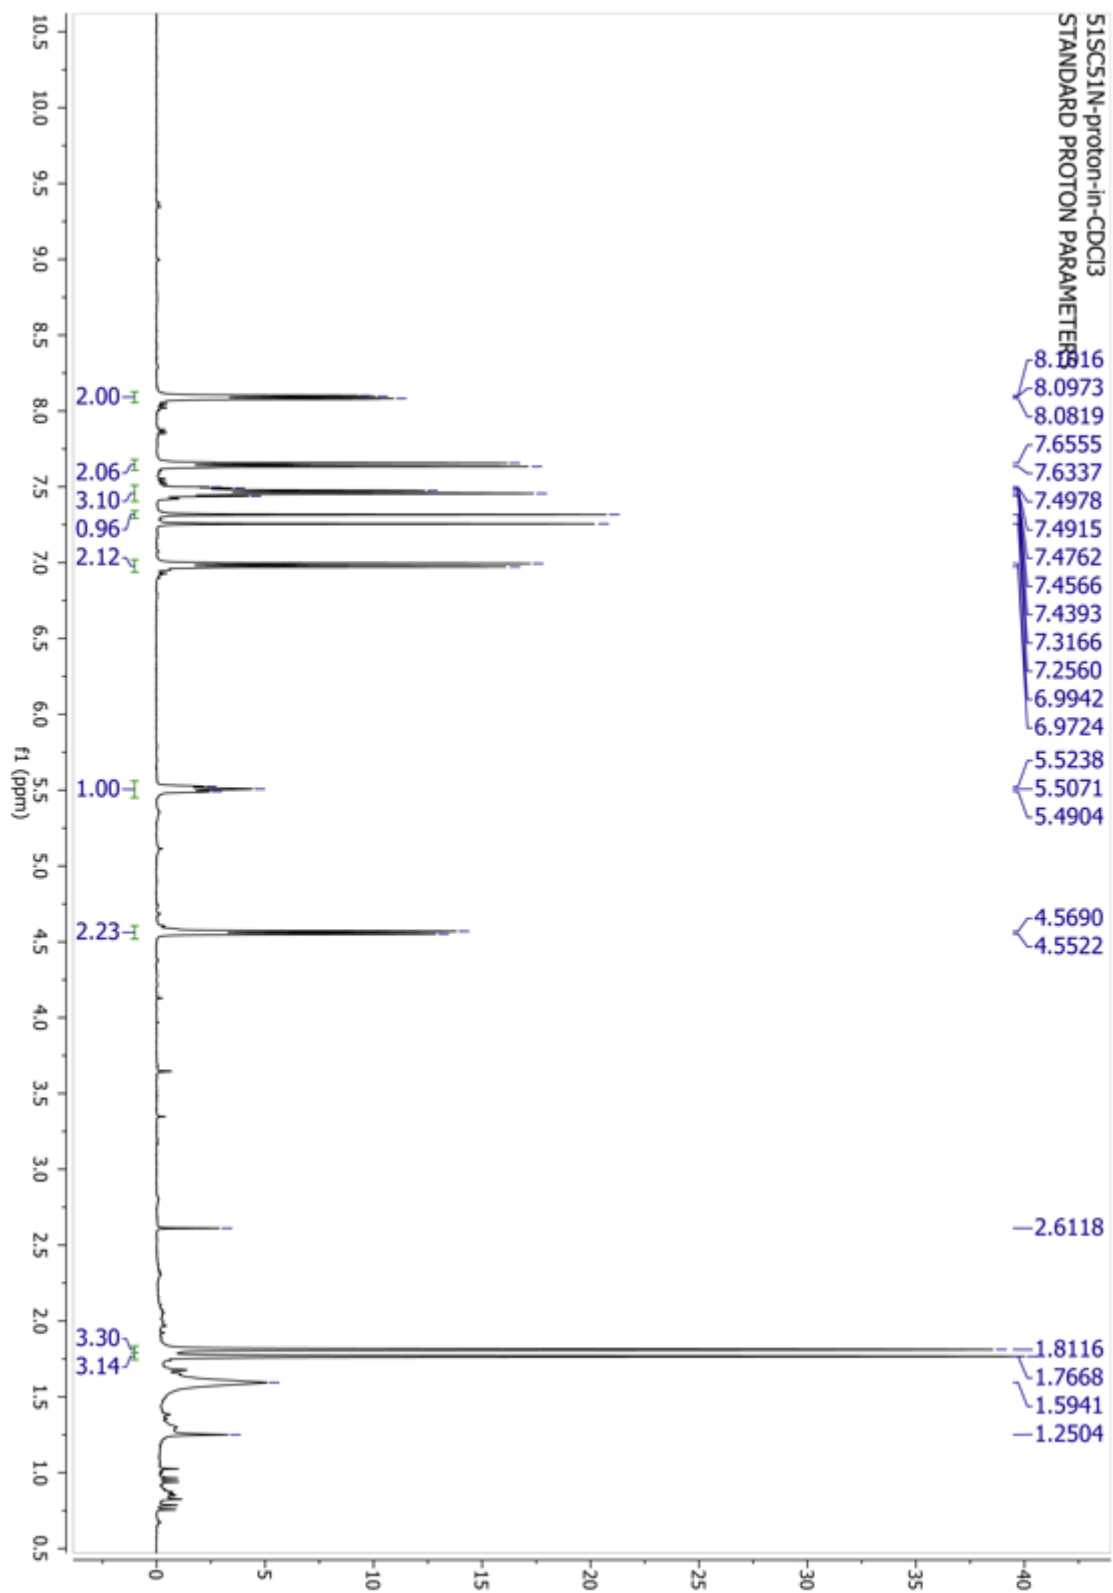

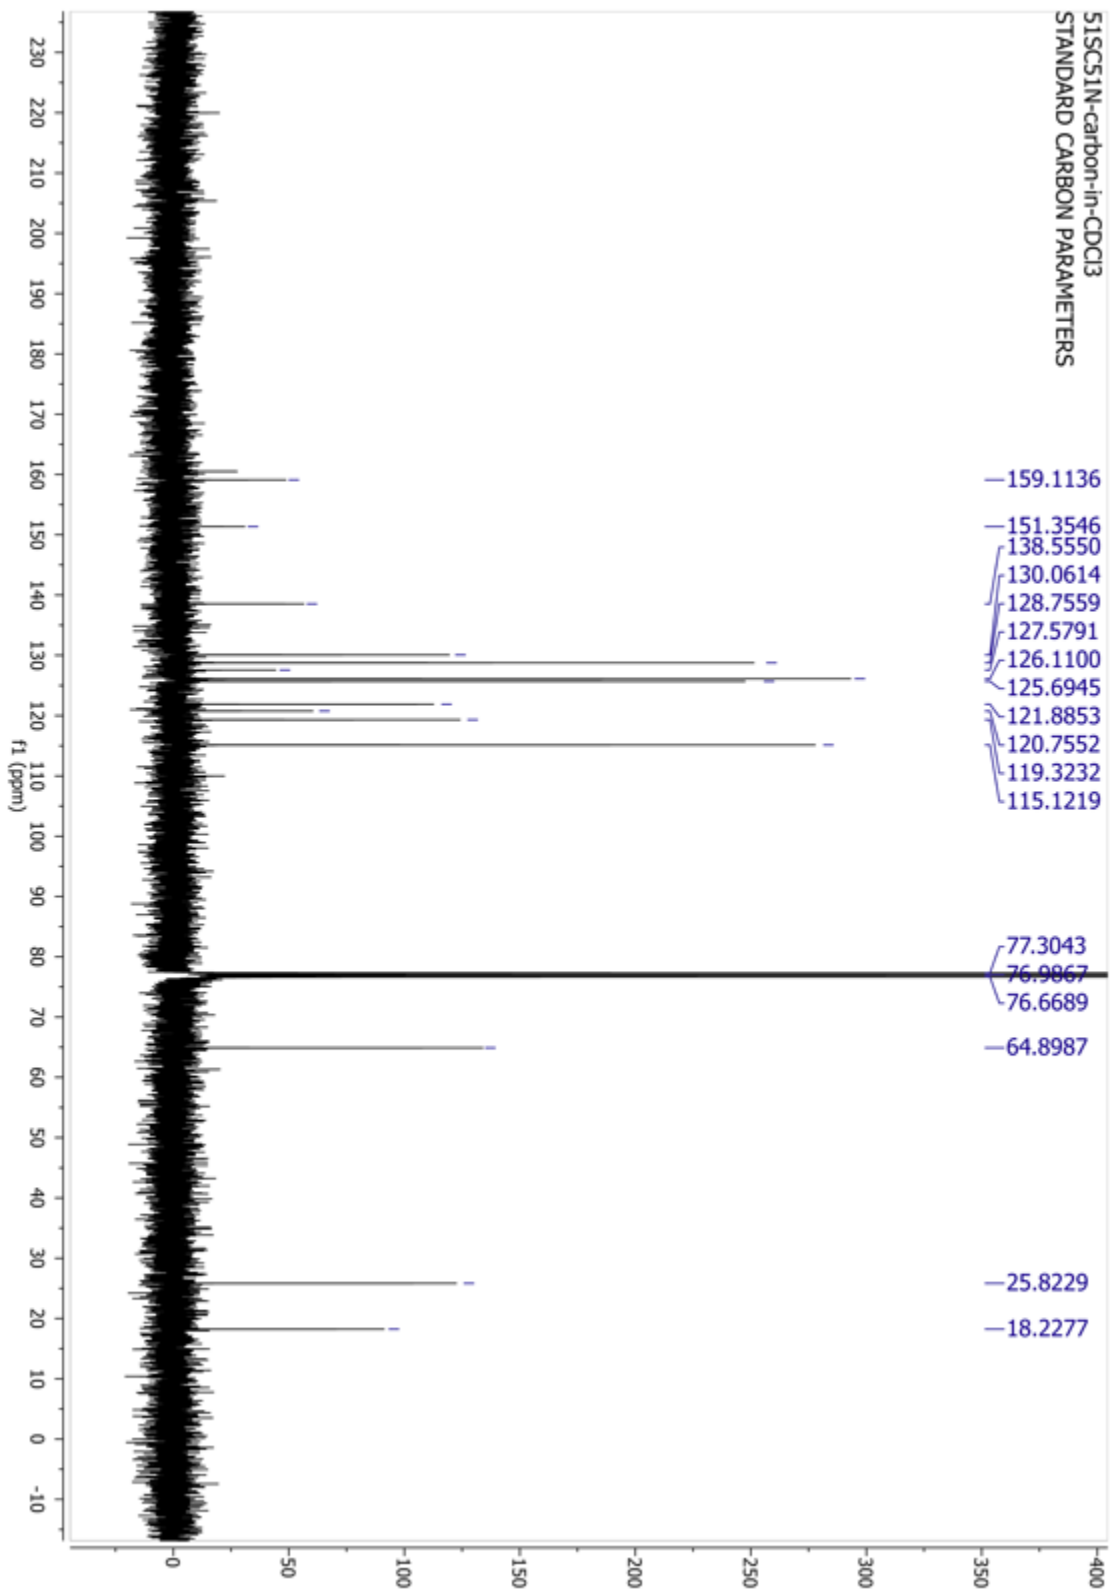

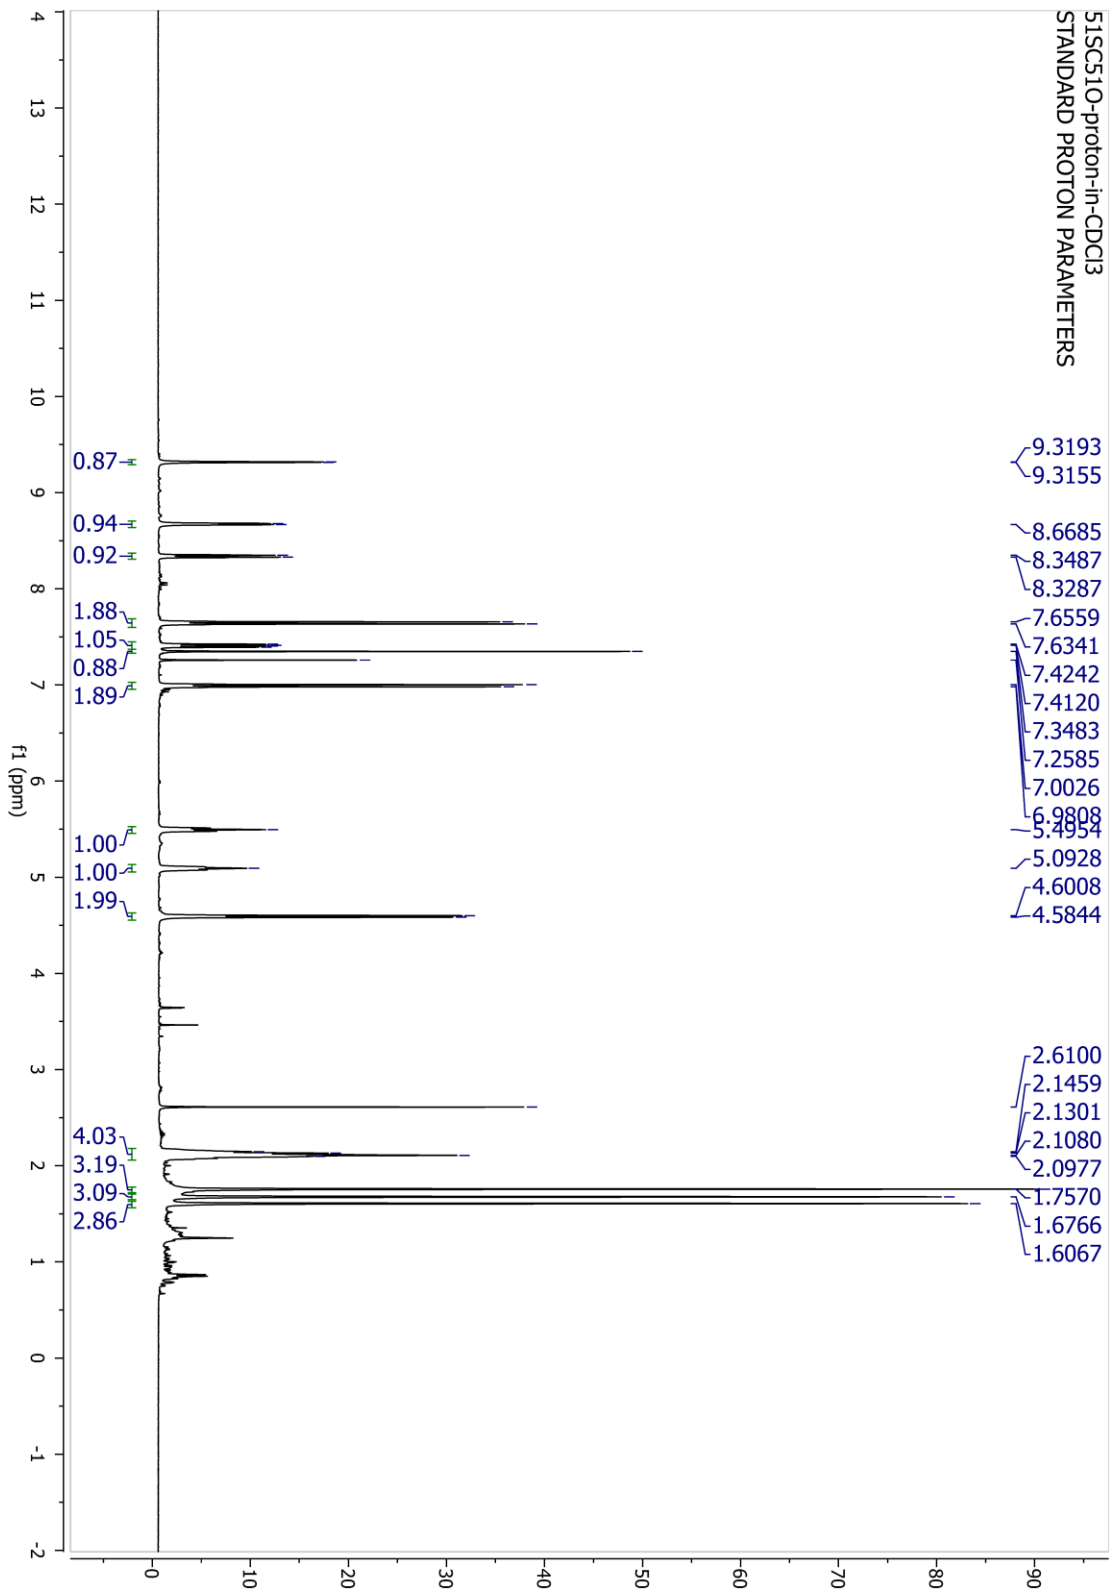

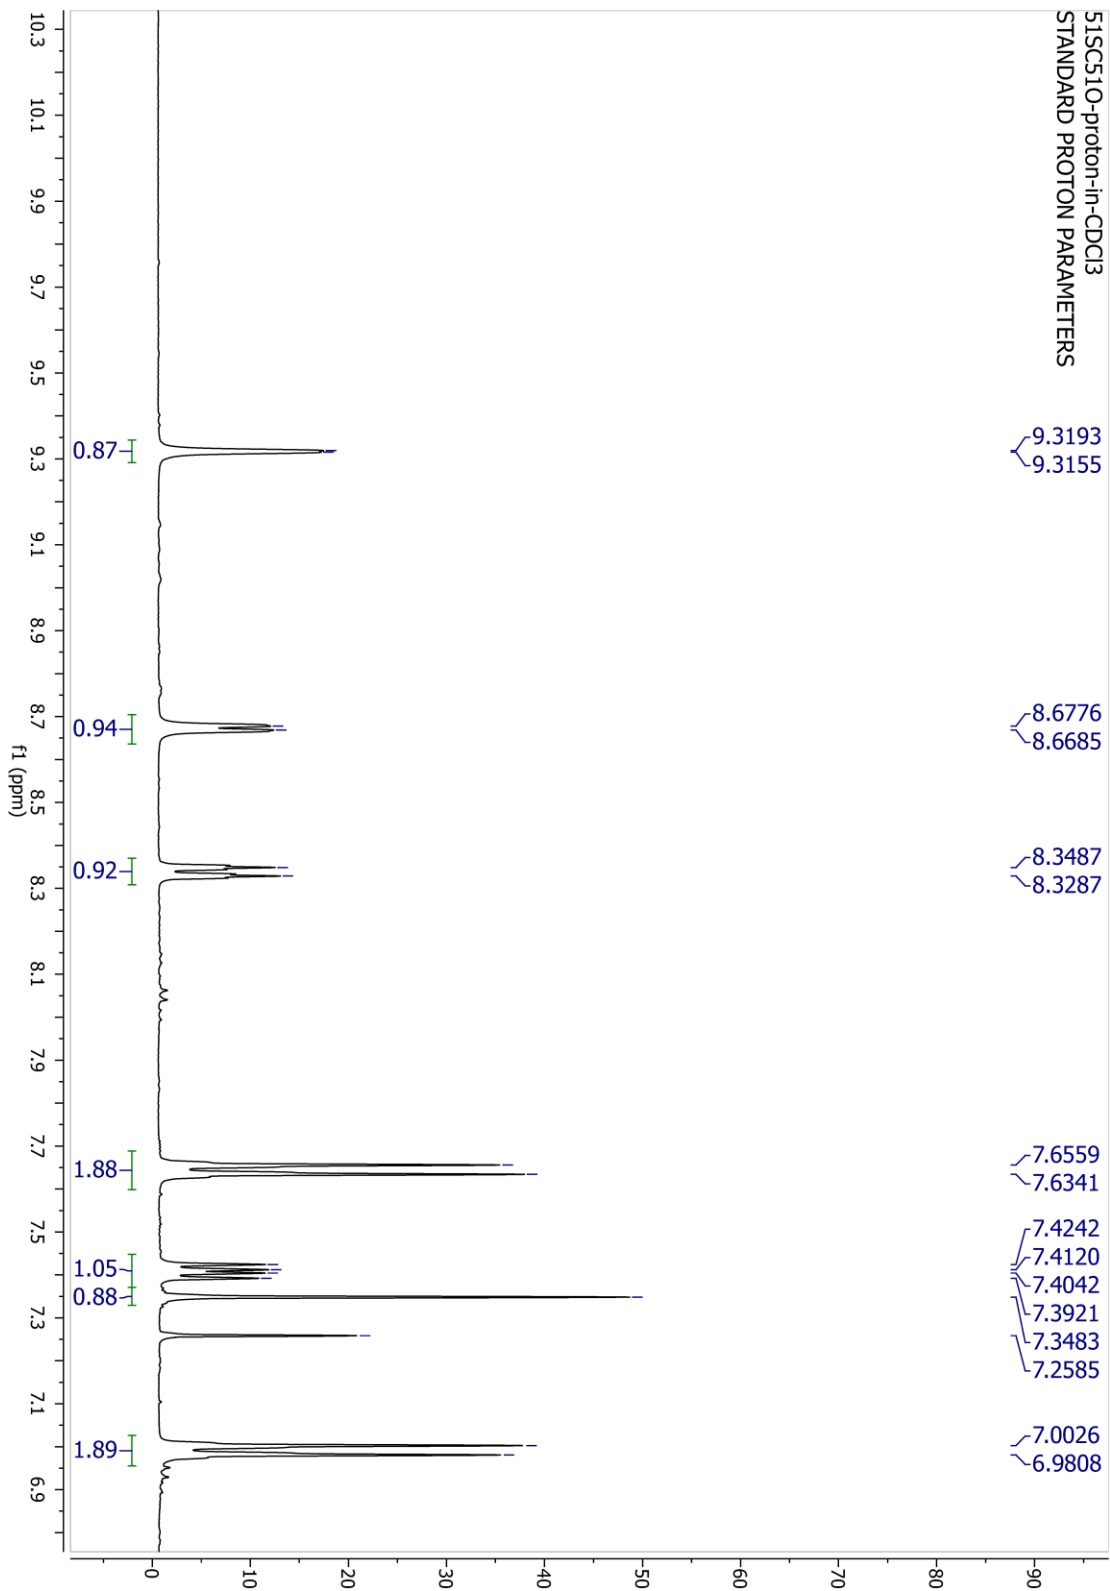

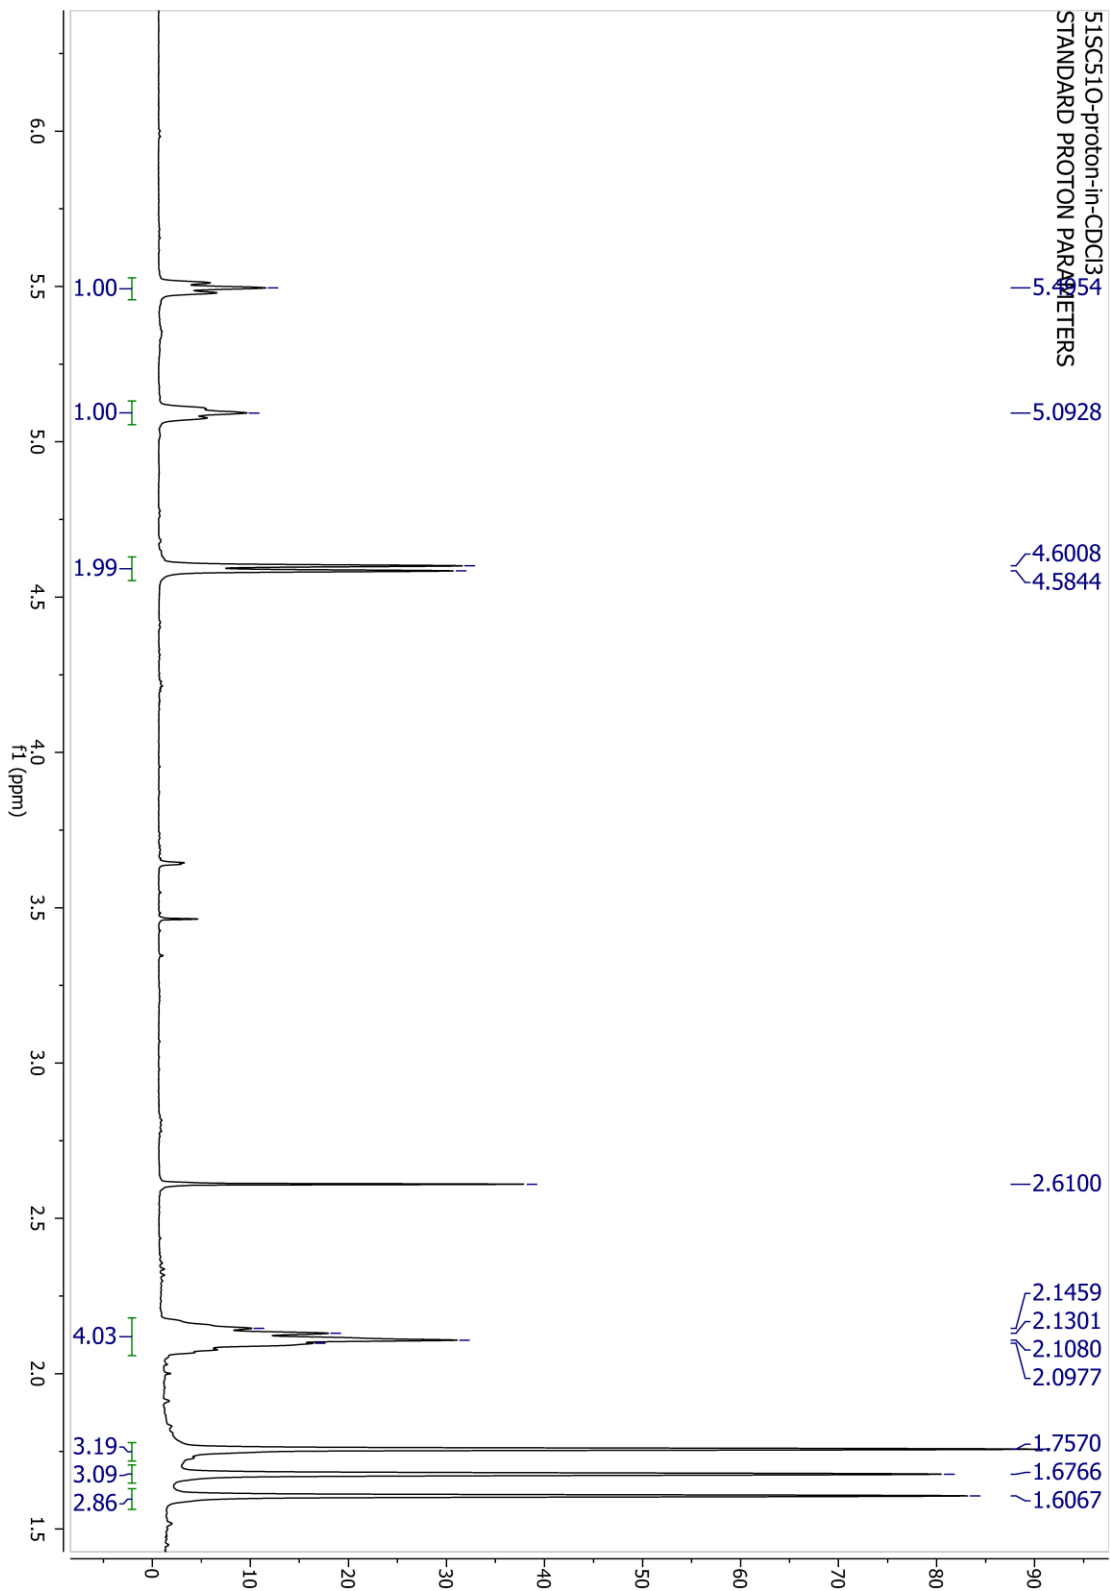

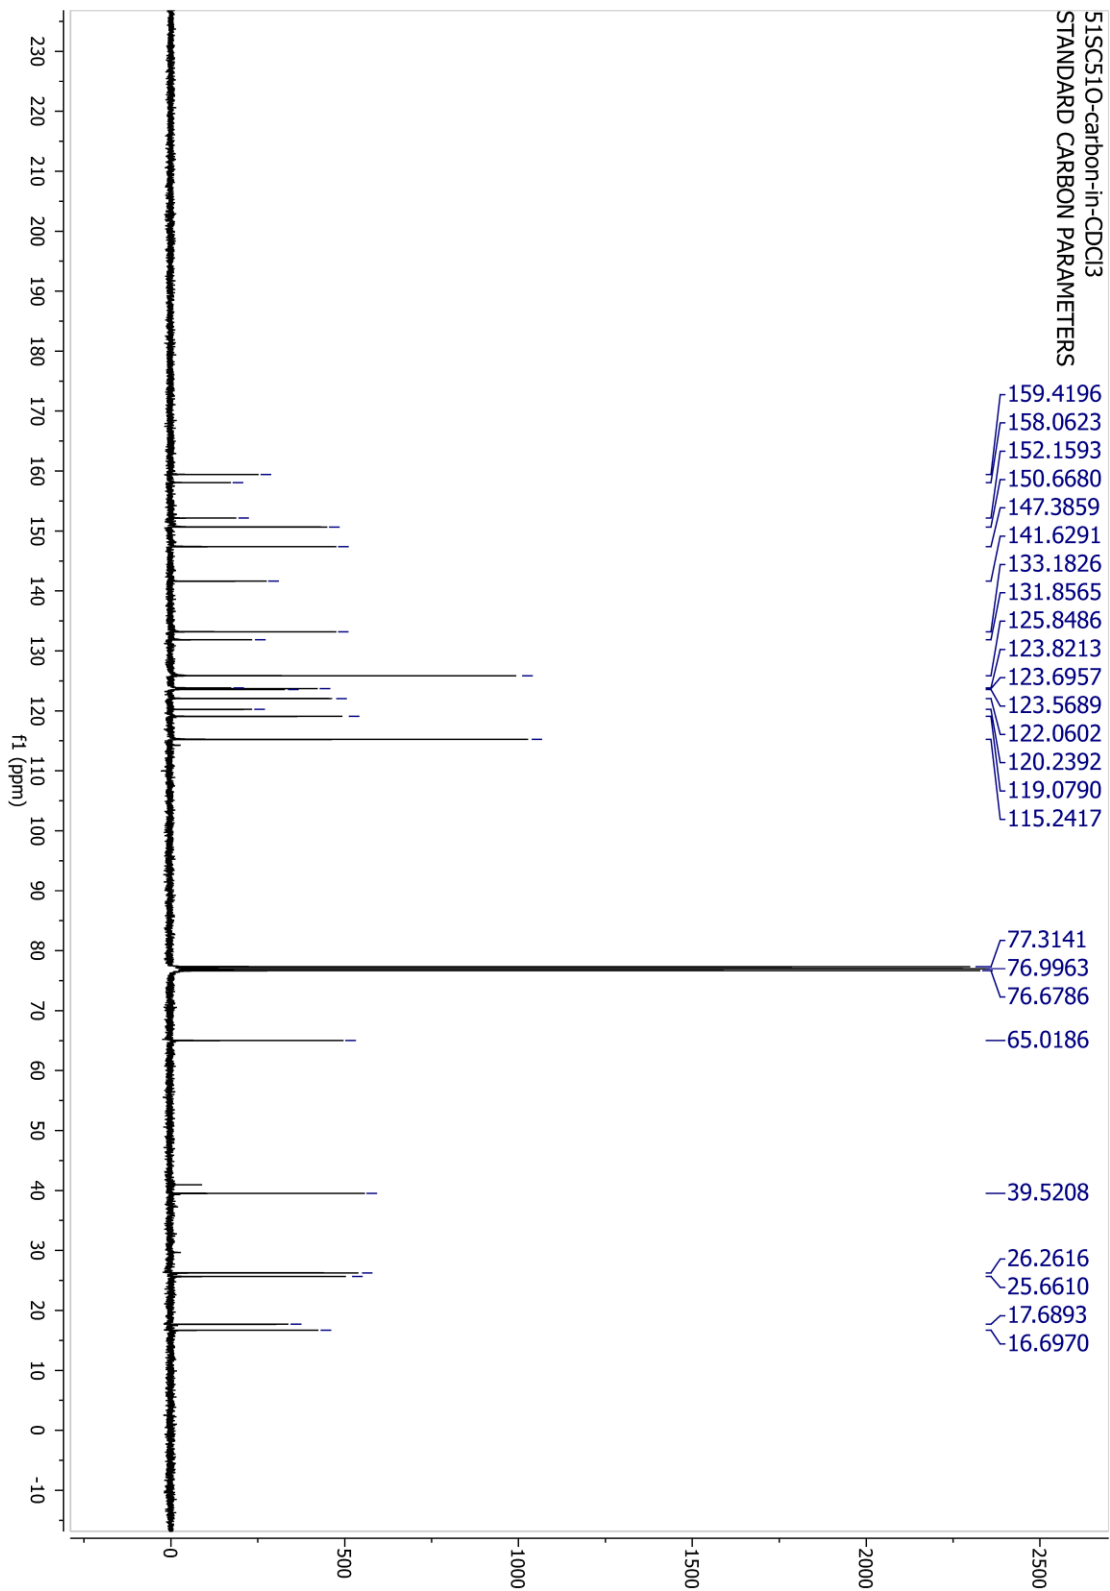



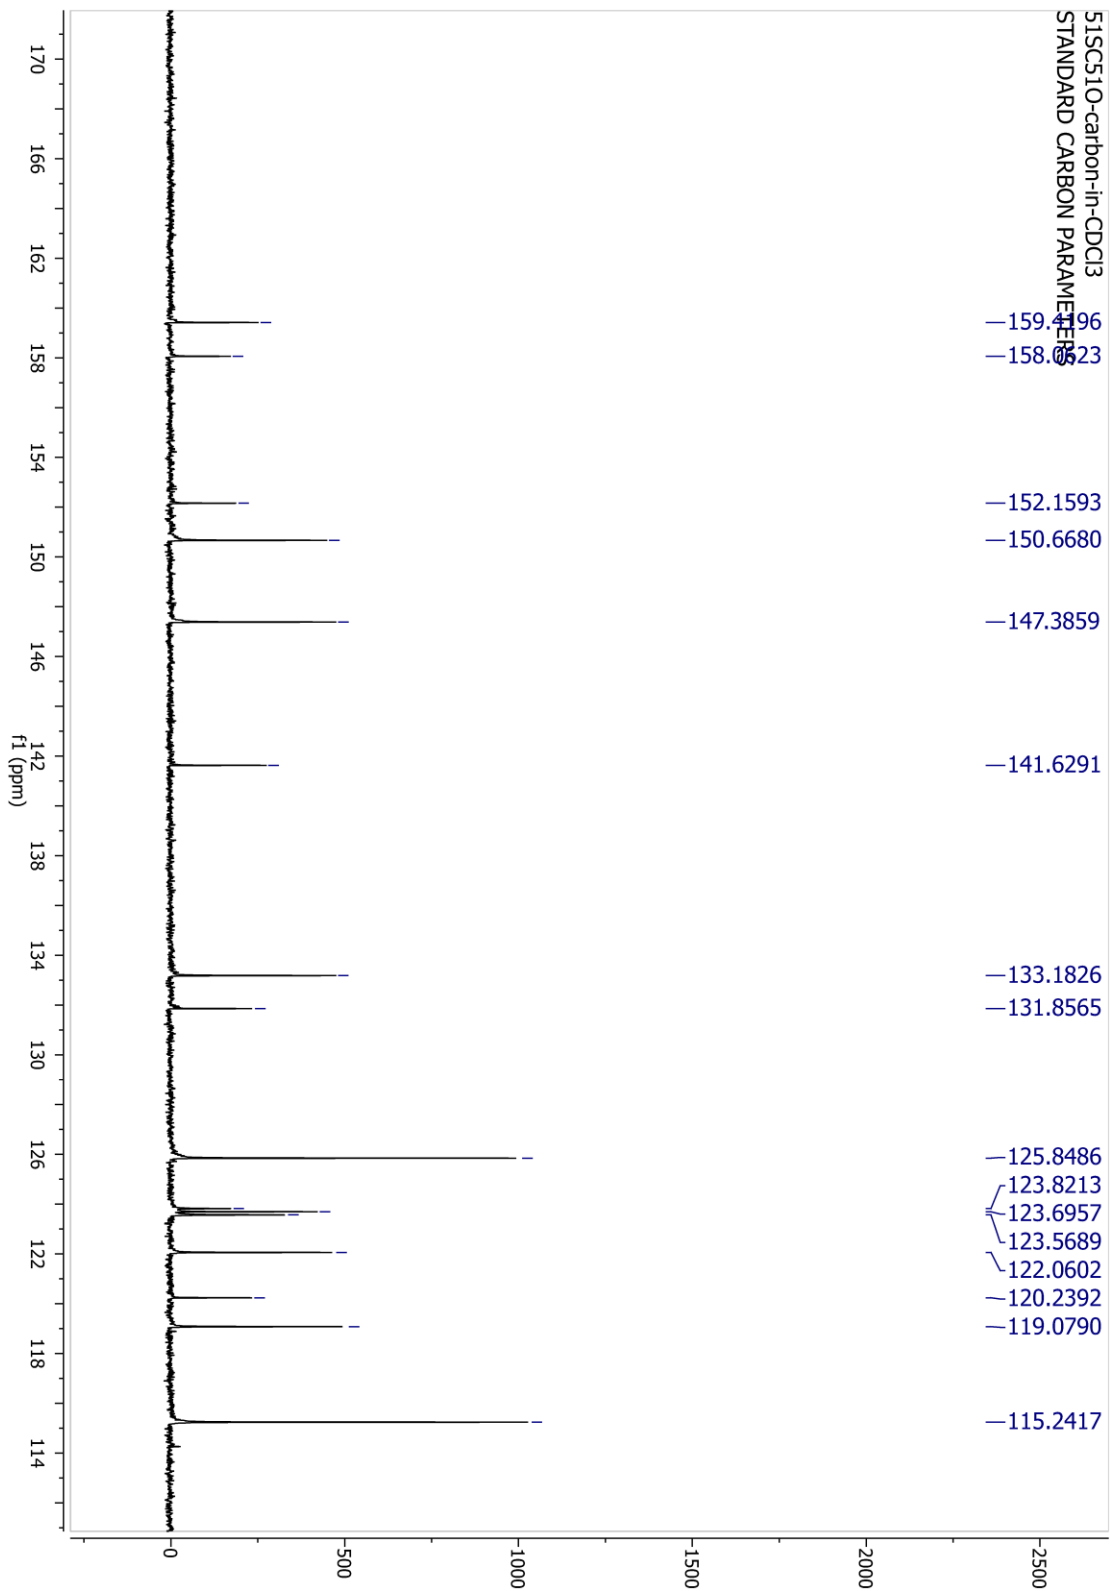

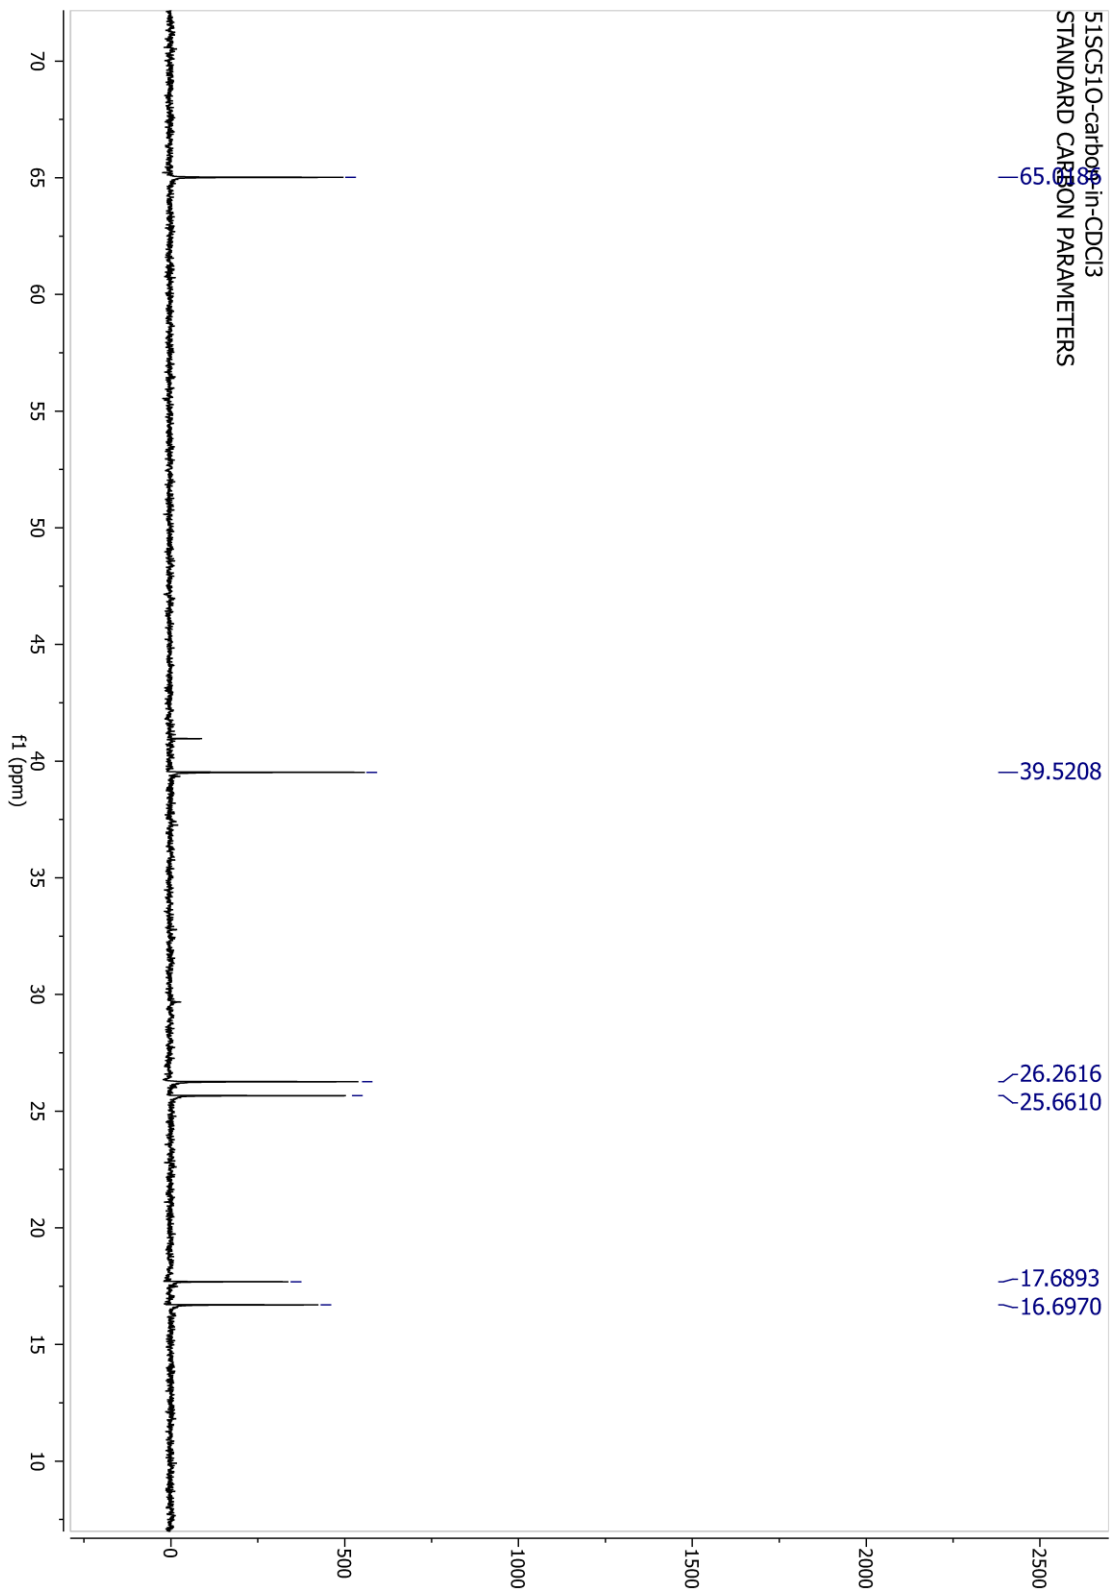

SM2017-58-45  
STANDARD PROTON PARAMETERS

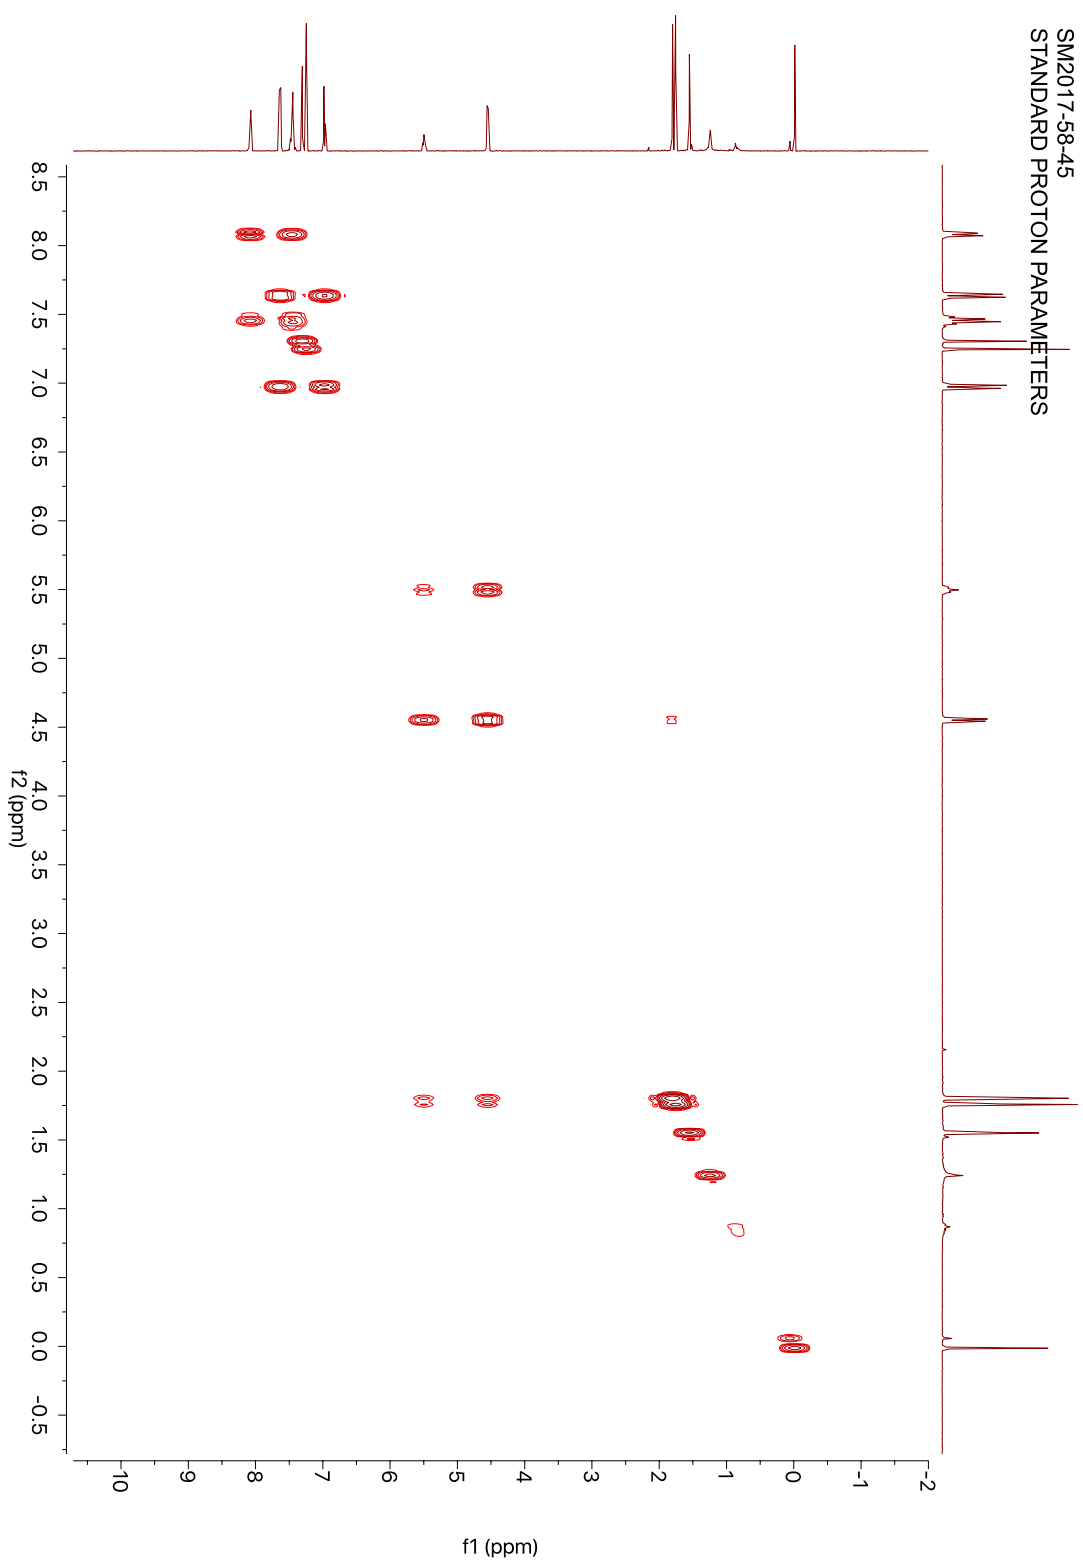

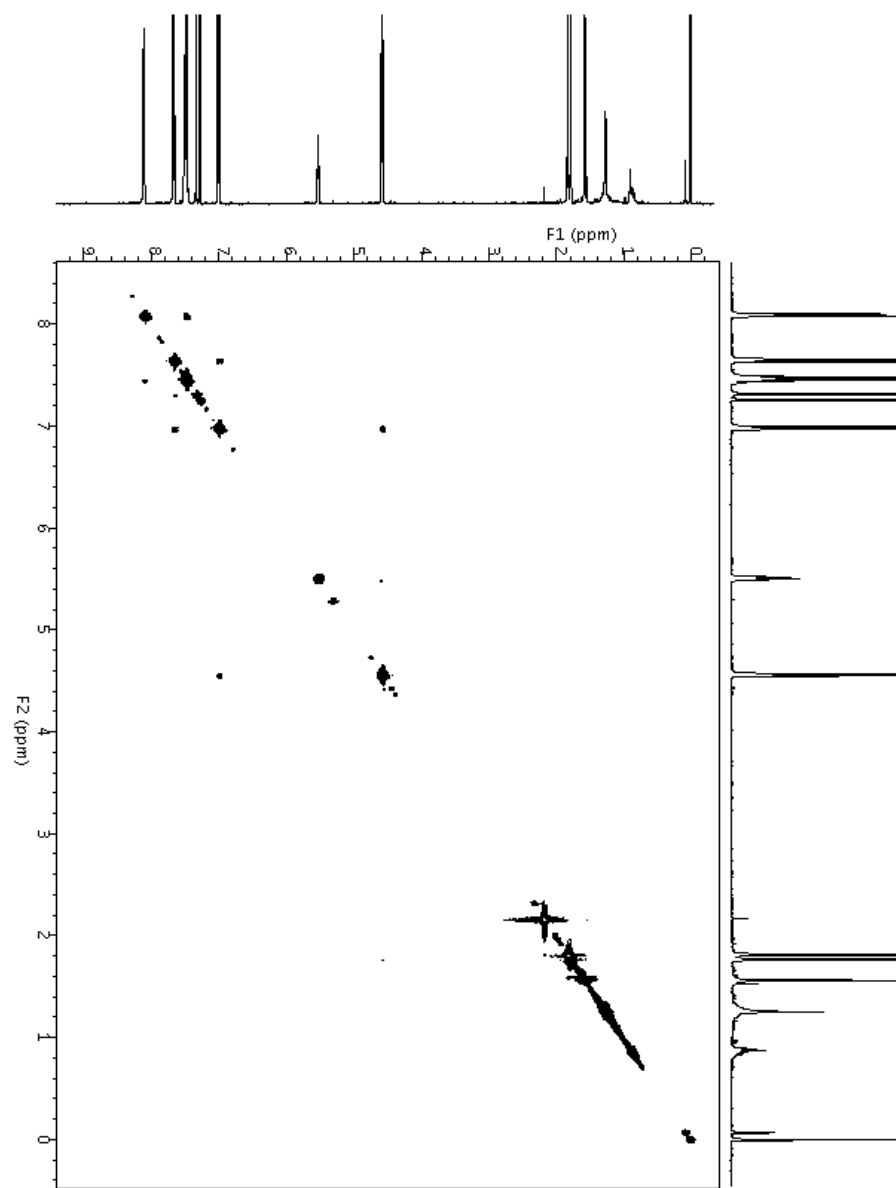

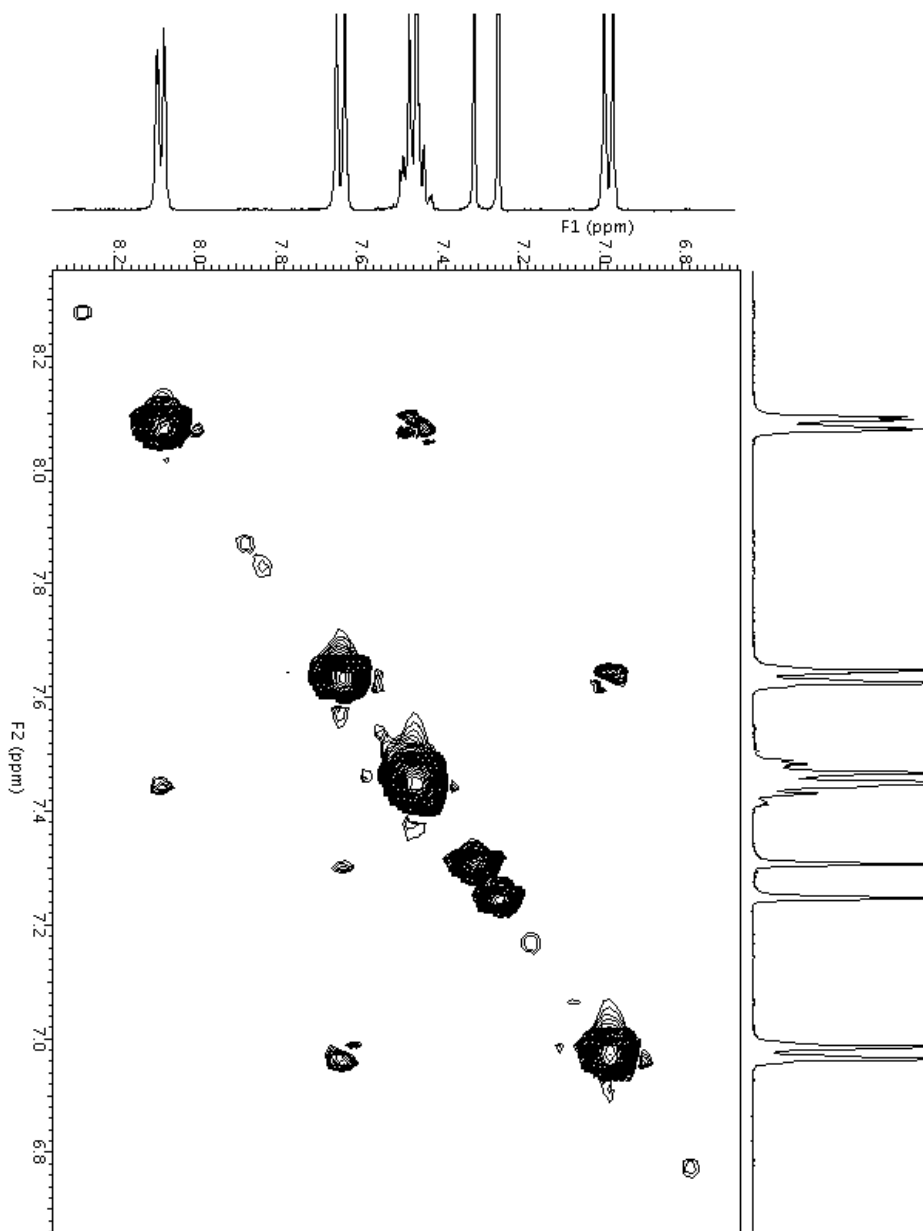

gCOSY  
SM2017-58-44  
STANDARD PROTON PARAMETERS

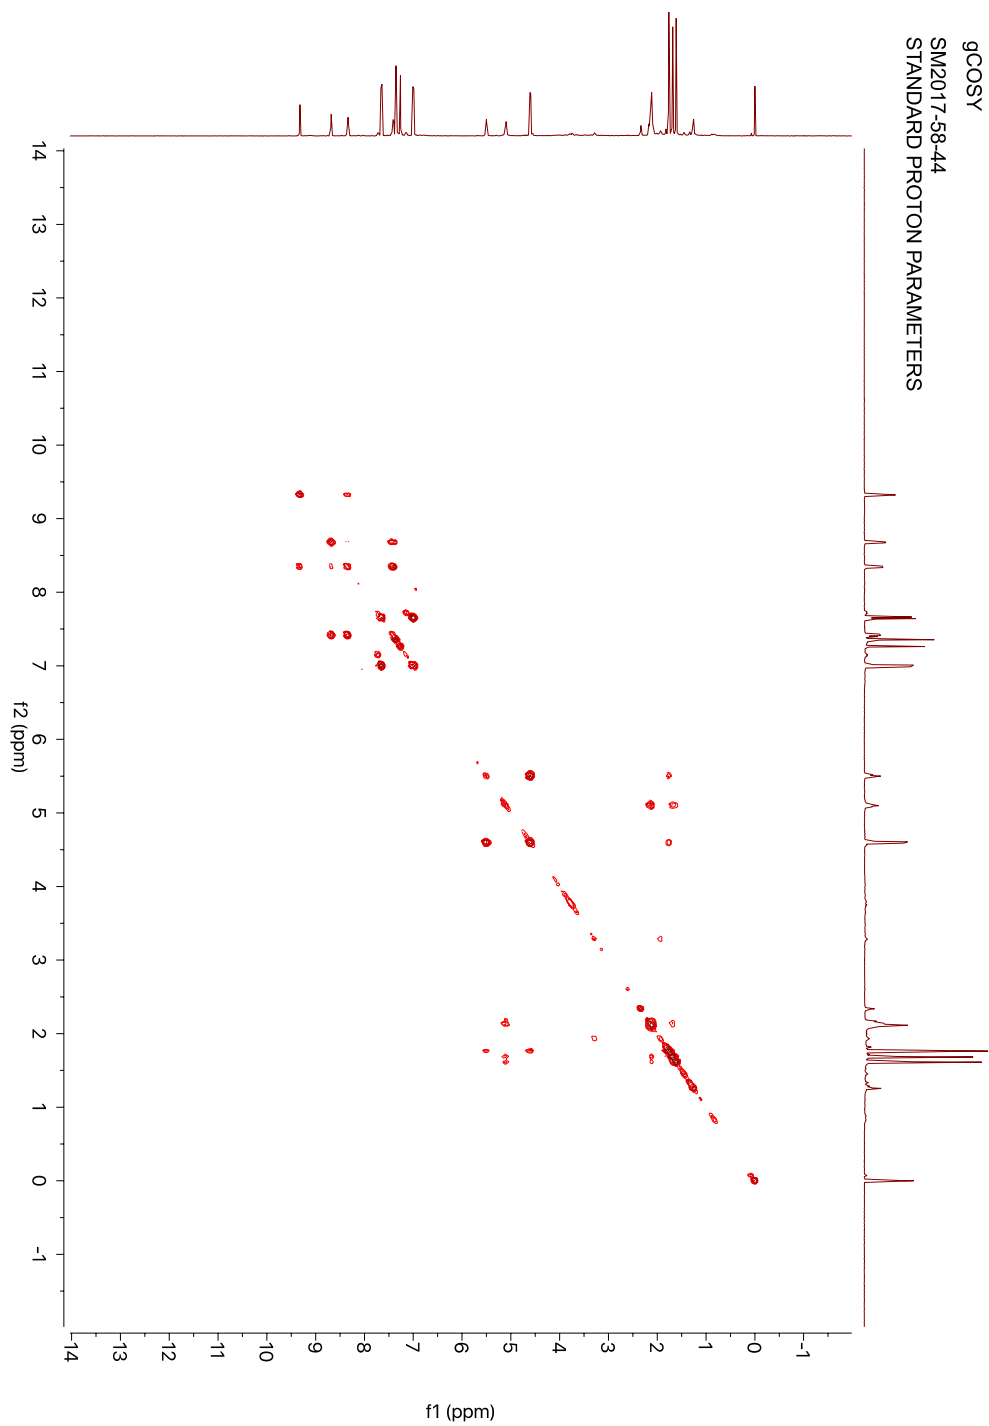

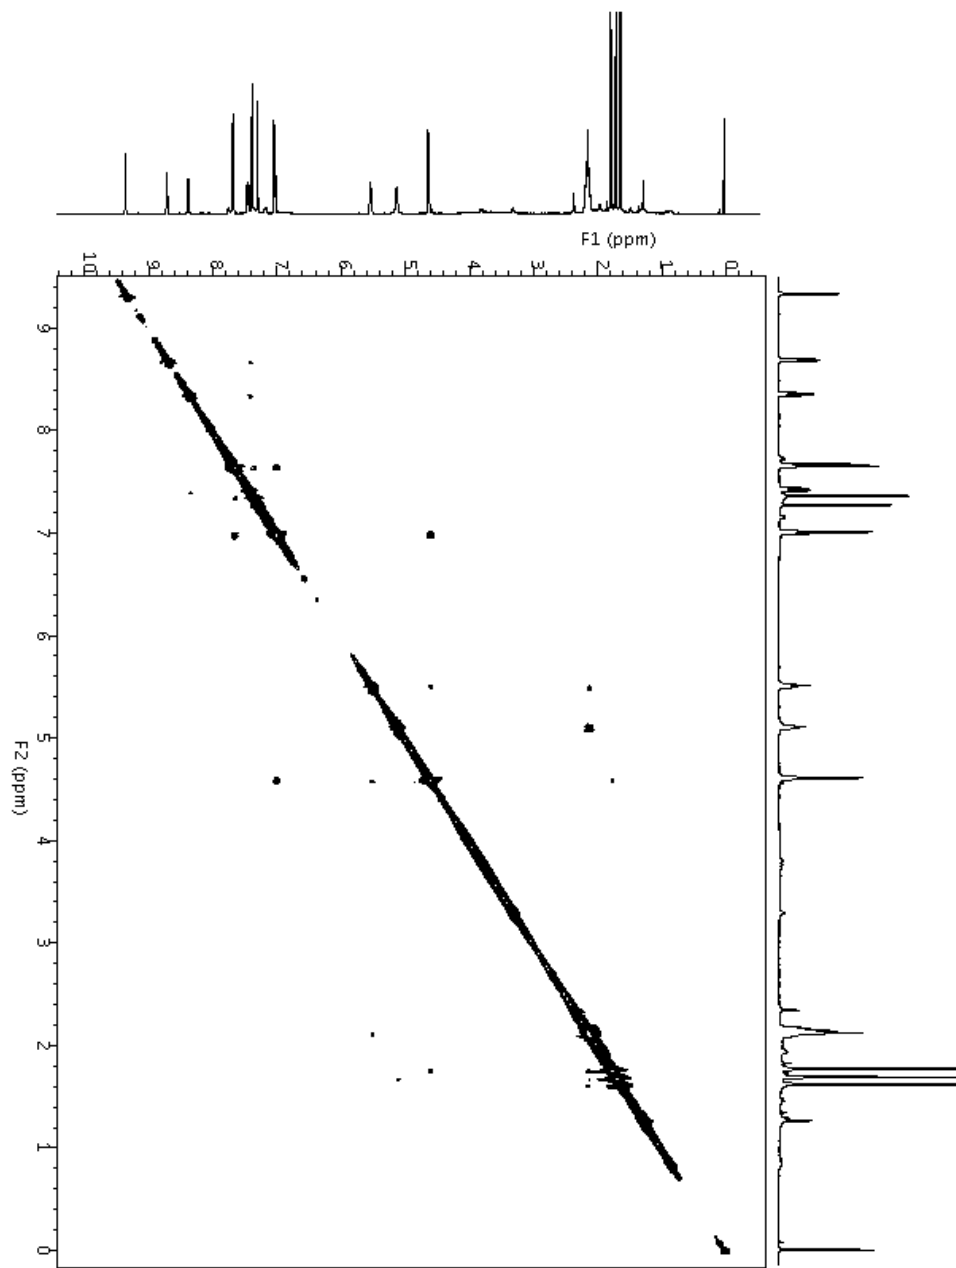

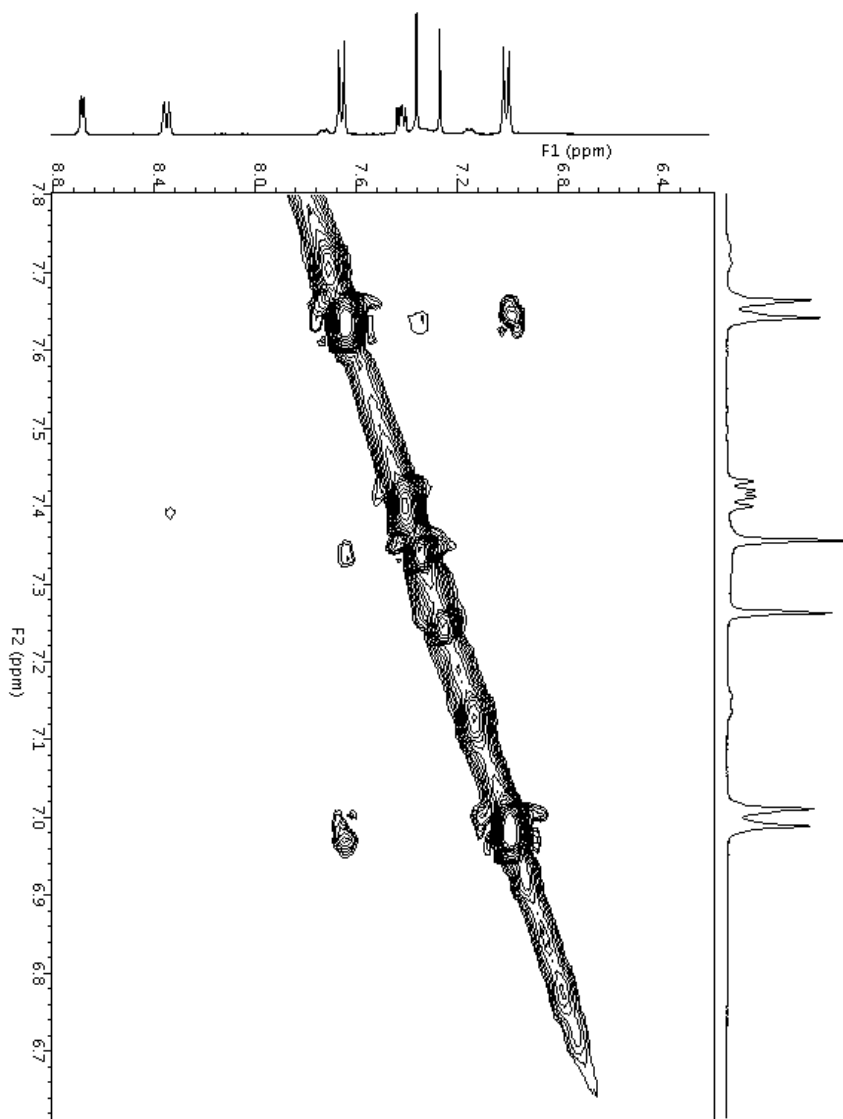



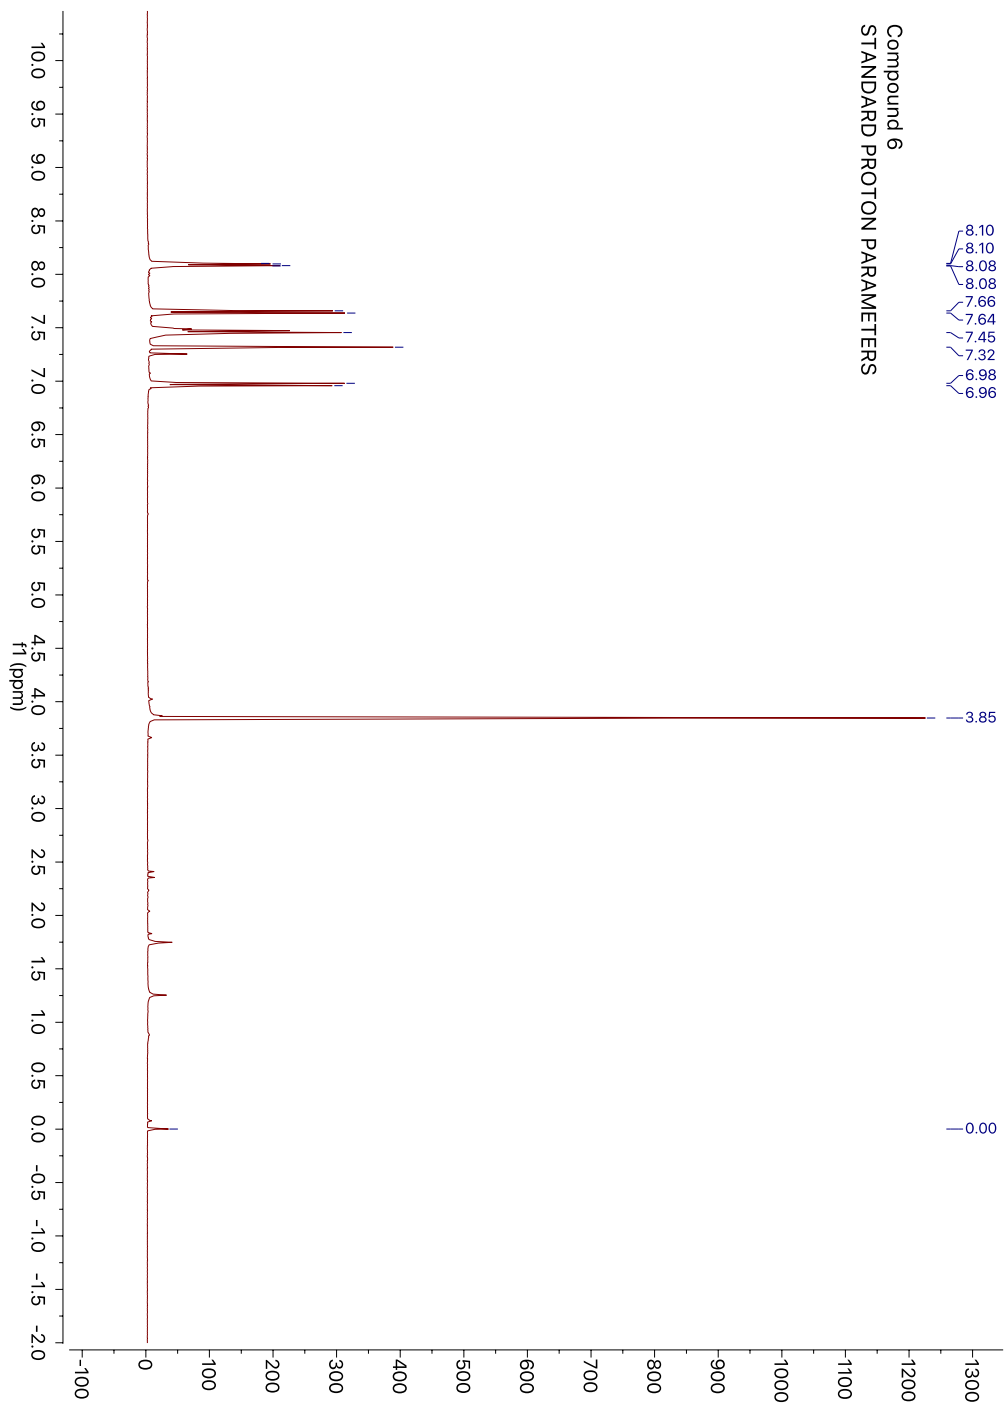

Brett Copp Route

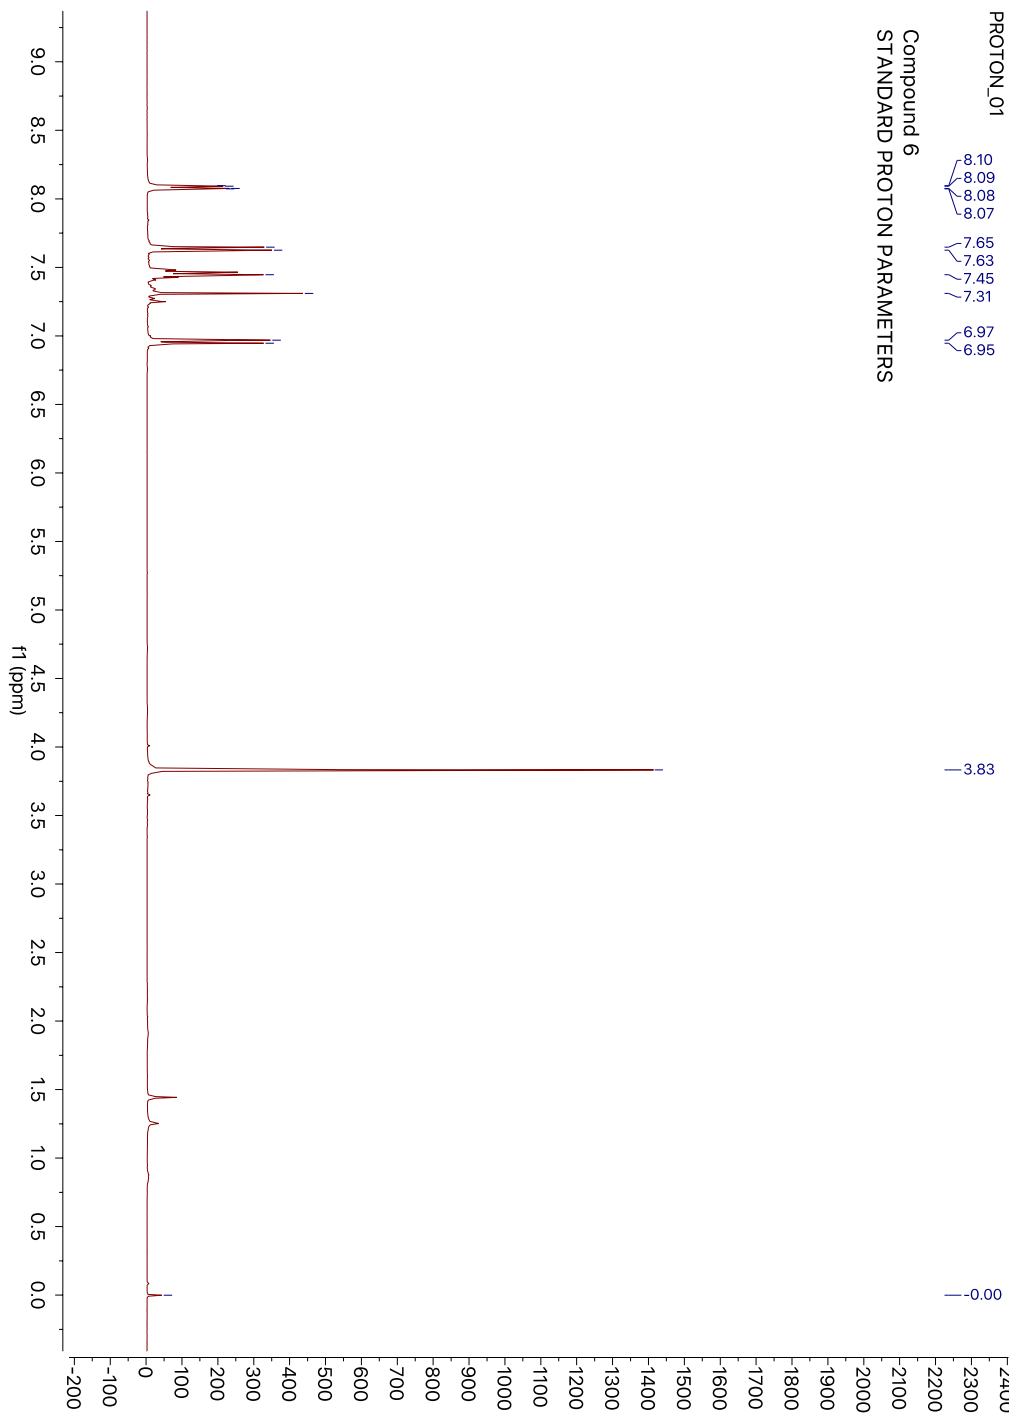

Van Leuson Route
